# Supplementary material for: Thermogravimetric and spectroscopic analyses along with the kinetic modeling of the pyrolysis of phosphate tailings
Source: Royal Society of Chemistry journal article supplement (doi:10.1039/d3ra01300f), 2023-01-01
Supplement: d3ra01300f1.pdf [file d3ra01300f1.pdf]

## Supporting Information

### Thermogravimetric and spectroscopic analyses, along with the kinetic modeling, of the pyrolysis of phosphate tailings

Xue-Mei Yuan<sup>a</sup>, Hui-Juan Xie<sup>a</sup>, Deng-Pan Nie<sup>a,\*</sup>, Yu Zhang<sup>b,\*</sup>, Lan Zhou<sup>a,c</sup>, Yi-Yi Wu<sup>a</sup> and Zhu Wen<sup>a</sup>

\*Corresponding Author: Deng-Pan Nie

E-mail: ndpz@sina.com

Postal address: School of Chemical Engineering, Guizhou Minzu University, Guiyang, China

Telephone number: +86 13339619988

\*Corresponding Author: Yu Zhang

E-mail: 342114915@qq.com

Postal address: College of Chemistry and Chemical Engineering, Guizhou University, Guiyang, China

Telephone number: +86 13368515556

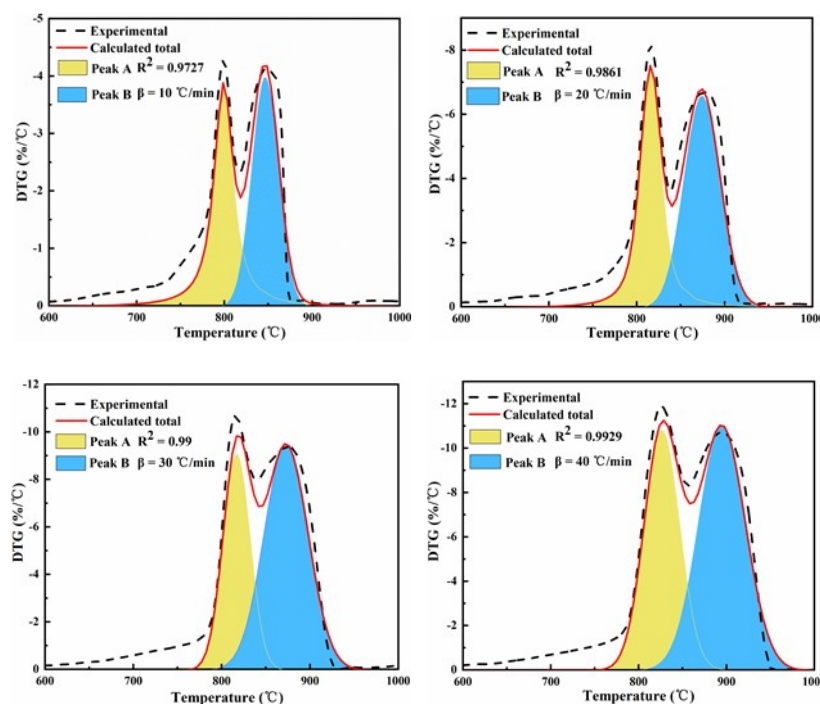

**Fig. S1.** Optimization of the decomposition process of phosphate tailings at different heating rates.

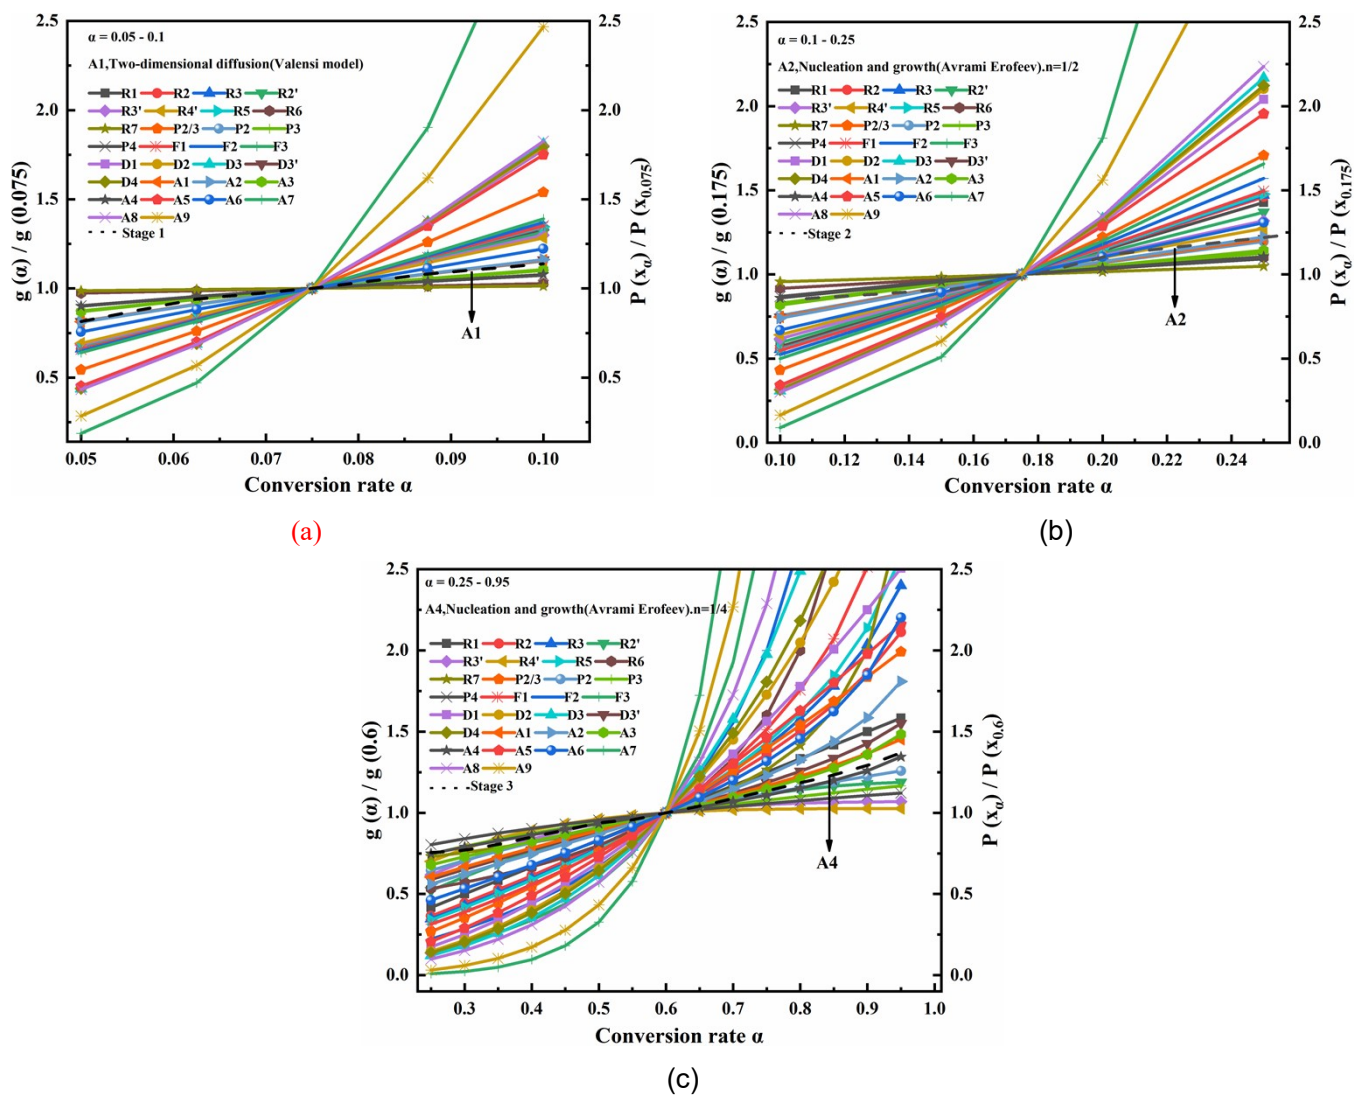

**Fig. S2.** Analysis of the thermal degradation mechanism of phosphate tailings at different conversion rates by the Criado method.

**Table S.1:** Common mechanism functions of solid phase reaction.

| Reaction model                                                | Symbol | Integral form $g(\alpha)$              |
|---------------------------------------------------------------|--------|----------------------------------------|
| Phase boundary-controlled reaction (one-dimensional movement) | R1     | $\alpha$                               |
| Phase boundary-controlled reaction (contracting area)         | R2     | $1 - (1 - \alpha)^{1/2}$               |
| Phase boundary-controlled reaction (contracting volume)       | R3     | $1 - (1 - \alpha)^{1/3}$               |
| reaction stage                                                | R2'    | $1 - (1 - \alpha)^2$                   |
| reaction stage                                                | R3'    | $1 - (1 - \alpha)^3$                   |
| reaction stage                                                | R4'    | $1 - (1 - \alpha)^4$                   |
| reaction stage                                                | R5     | $1 - (1 - \alpha)^{1/4}$               |
| Chemical reaction (second level)                              | R6     | $(1 - \alpha)^{-1}$                    |
| Chemical reaction (level 2/3)                                 | R7     | $(1 - \alpha)^{-1/2}$                  |
| Power low                                                     | P2/3   | $\alpha^{3/2}$                         |
| Power low                                                     | P2     | $\alpha^{1/2}$                         |
| Power low                                                     | P3     | $\alpha^{1/3}$                         |
| Power low                                                     | P4     | $\alpha^{1/4}$                         |
| First order                                                   | F1     | $-\ln(1 - \alpha)$                     |
| Second order                                                  | F2     | $-1 + (1 - \alpha)^{-1}$               |
| Third order                                                   | F3     | $1/2([1 - \alpha]^{-2} - 1)$           |
| One-dimensional diffusion                                     | D1     | $\alpha^2$                             |
| Two-dimensional diffusion (Valensi model)                     | D2     | $(1 - \alpha)\ln(1 - \alpha) + \alpha$ |
| Three-dimensional diffusion (Jander model)                    | D3     | $(1 - [1 - \alpha]^{1/3})^2$           |
| Three-dimensional diffusion (Jander model)                    | D3'    | $(1 - [1 - \alpha]^{1/3})^{1/2}$       |
| Three-dimensional diffusion (Ginstlinge-Brounshtein model)    | D4     | $(1 - 2/3\alpha) - (1 - \alpha)^{2/3}$ |
| Two-dimensional diffusion (Valensi model)                     | A1     | $(1 - [1 - \alpha]^{1/2})^{1/2}$       |
| Nucleation and growth (Avrami-Erofeev, $n = 1/2$ )            | A2     | $-\ln(1 - \alpha)^{1/2}$               |
| Nucleation and growth (Avrami-Erofeev, $n = 1/3$ )            | A3     | $-\ln(1 - \alpha)^{1/3}$               |
| Nucleation and growth (Avrami-Erofeev, $n = 1/4$ )            | A4     | $-\ln(1 - \alpha)^{1/4}$               |
| Three-dimensional diffusion (Jander model)                    | A5     | $([1 + \alpha]^{1/3} - 1)^2$           |
| Nucleation and growth (Avrami-Erofeev, $n = 2/3$ )            | A6     | $-\ln(1 - \alpha)^{2/3}$               |
| Nucleation and growth (Avrami-Erofeev, $n = 4$ )              | A7     | $-\ln(1 - \alpha)^4$                   |
| Nucleation and growth (Avrami-Erofeev, $n = 2$ )              | A8     | $-\ln(1 - \alpha)^2$                   |
| Nucleation and growth (Avrami-Erofeev, $n = 3$ )              | A9     | $-\ln(1 - \alpha)^3$                   |

**Table S.2:** Possible reaction equations in the pyrolysis process of phosphate tailings.

| Equation                                                                                                        | T/ $\Delta G$                         | Number |
|-----------------------------------------------------------------------------------------------------------------|---------------------------------------|--------|
| $\text{CaMg}(\text{CO}_3)_2(\text{s}) = \text{CaCO}_3(\text{s}) + \text{MgO}(\text{s}) + \text{CO}_2(\text{g})$ | $T = 500^\circ\text{C } \Delta G < 0$ | (1)    |
| $\text{CaCO}_3(\text{s}) = \text{CaO}(\text{s}) + \text{CO}_2(\text{g})$                                        | $T = 900^\circ\text{C } \Delta G < 0$ | (2)    |
| $\text{SiO}_2(\text{s}) + 6\text{HF}(\text{g}) = \text{H}_2\text{SiF}_6 + 2\text{H}_2\text{O}(\text{l})$        | $T = 300^\circ\text{C } \Delta G > 0$ | (3)    |
| $\text{H}_2\text{SiF}_6 = \text{SiF}_4(\text{g}) + 2\text{HF}(\text{g})$                                        | $T = 200^\circ\text{C } \Delta G < 0$ | (4)    |
| $\text{CaF}_2 + \text{H}_2\text{SiF}_6 = \text{CaSiF}_6 + 2\text{HF}(\text{g})$                                 | $T = 600^\circ\text{C } \Delta G < 0$ | (5)    |
| $\text{CaO}(\text{s}) + 2\text{HF}(\text{g}) = \text{CaF}_2 + \text{H}_2\text{O}(\text{l})$                     | $T = 0^\circ\text{C } \Delta G < 0$   | (6)    |
| $2\text{Ca}_5(\text{PO}_4)_3\text{F} = 3\text{Ca}_3(\text{PO}_4)_2 + \text{CaF}_2$                              | $T = 0^\circ\text{C } \Delta G > 0$   | (7)    |
| $2\text{CaO} + \text{SiO}_2 = \text{Ca}_2\text{SiO}_4$                                                          | $T = 0^\circ\text{C } \Delta G < 0$   | (8)    |
| $3\text{CaO} + \text{SiO}_2 = \text{Ca}_3\text{SiO}_5$                                                          | $T = 0^\circ\text{C } \Delta G < 0$   | (9)    |
